## Correction

# Correction: Correlations of *MTHFR* 677C>T Polymorphism with Cardiovascular Disease in Patients with End-Stage Renal Disease: A Meta-Analysis

The *PLOS ONE* Staff

The following information is missing from the Funding section:  
This work was financially supported by the Department of Education of Liaoning province (L20120113).

## Reference

1. Gao X-H, Zhang G-Y, Wang Y, Zhang H-Y (2014) Correlations of *MTHFR* 677C>T Polymorphism with Cardiovascular Disease in Patients with End-Stage Renal Disease: A Meta-Analysis. *PLoS ONE* 9(7): e102323. doi:10.1371/journal.pone.0102323

**Citation:** The *PLOS ONE* Staff (2014) Correction: Correlations of *MTHFR* 677C>T Polymorphism with Cardiovascular Disease in Patients with End-Stage Renal Disease: A Meta-Analysis. *PLoS ONE* 9(12): e116443. doi:10.1371/journal.pone.0116443

**Published:** December 19, 2014

**Copyright:** © 2014 The *PLOS ONE* Staff. This is an open-access article distributed under the terms of the Creative Commons Attribution License, which permits unrestricted use, distribution, and reproduction in any medium, provided the original author and source are credited.
